# Supplementary material for: Protocol for a randomised controlled trial of the combined effects of the GLP-1 receptor agonist liraglutide and exercise on maintenance of weight loss and health after a very low-calorie diet
Source: PubMed Central journal article supplement — BMJ Open. 2019 Nov 2;9(11):e031431. doi: 10.1136/bmjopen-2019-031431 (PMC6830609; doi:10.1136/bmjopen-2019-031431), 2019-11-02
Supplement: bmjopen-2019-031431supp001.pdf [file bmjopen-2019-031431supp001.pdf]

**English translation of informed consent form**

Project title: Synergy effect of the appetite hormone GLP-1 (LiragluTide) and Exercise on maintenance of weight loss and health after a low calorie diet – the S-LiTE randomized trial

**Statement by study participant:**

I have received written and oral information about the study and have sufficient knowledge about objectives, methods, advantages, risks and disadvantages to participate.

I know that participation is voluntary and that I can withdraw consent without losing my present or future rights to treatment.

I consent to participate in the trial and to have biological material collected and stored in a research biobank. I have received a copy of this consent form and a copy of the written information about the study.

Name of participant: \_\_\_\_\_

Date: \_\_\_\_\_ Signature: \_\_\_\_\_

If new information about your state of health appears in the study, you will be informed. If you wish to **decline knowledge** of new information about your state of health, please mark here: \_\_\_\_\_ (mark with X).

Do you wish to be informed about the results of the study and potential implications for you?

Yes\_\_\_\_\_ (mark with X) No\_\_\_\_\_ (mark with X)

**Statement by researcher**

I confirm that the participant has received oral and written information about the study.

To the best of my belief, sufficient information has been given in order for the participant to make a decision about participation in the study.

Name of person taking the consent:

Date: \_\_\_\_\_ Signature: \_\_\_\_\_

Project identification:

EudraCT nr. 2015-005585-32
